# Supplementary material for: Integrated Analysis of Metabolome and Volatile Profiles of Germinated Brown Rice from the Japonica and Indica Subspecies
Source: MDPI journal article supplement (doi:10.3390/foods10102448), 2021-10-14
Supplement: s1 [file s1]

Article

# Integrated Analysis of Metabolome and Volatile Profiles of Germinated Brown Rice from the *Japonica* and *Indica* Subspecies

Chenguang Zhou <sup>1</sup>, Yaojie Zhou <sup>1</sup>, Yuqian Hu <sup>1</sup>, Bin Li <sup>1</sup>, Roujia Zhang <sup>1</sup>, Kaiyi Zheng <sup>1</sup>, Jie Liu <sup>2</sup>, Jing Wang <sup>2</sup>, Min Zuo <sup>3</sup> and Siyao Liu <sup>4,\*</sup>

- <sup>1</sup> School of Food and Biological Engineering, Jiangsu University, Zhenjiang 212013, China; zhouchenguang@ujs.edu.cn (C.Z.); ZhouYaojie2021@gmail.com (Y.Z.); hu13636001423@163.com (Y.H.); lb13753676201@163.com (B.L.); 1000005191@ujs.edu.cn (R.Z.); kaiyizhengjsu@126.com (K.Z.)  
<sup>2</sup> China-Canada Joint Lab of Food Nutrition and Health (Beijing), Beijing Technology and Business University, Beijing 100048, China; liu\_jie@btbu.edu.cn (J.L.); wangjing@th.btbu.edu.cn (J.W.)  
<sup>3</sup> National Engineering Laboratory for Agri-product Quality Traceability, Beijing Technology and Business University, Beijing 100048, China; zuomin1234@163.com  
<sup>4</sup> School of Pharmacy, Jiangsu University, Zhenjiang 212013, China  
 \* Correspondence: siyaoliu@ujs.edu.cn

## Supplementary Materials

**Table S1.** Metabolites identified by GC-MS in brown rice and germinated brown rice samples.

| compound name           | Quant mass | EI similarity | RT <sup>a</sup> | RI <sup>b</sup> |
|-------------------------|------------|---------------|-----------------|-----------------|
| lactic acid             | 117        | 966           | 4.259           | 1045            |
| glycolic acid           | 147        | 935           | 4.399           | 1058            |
| alanine                 | 116        | 873           | 4.837           | 1097            |
| hydroxylamine           | 133        | 943           | 5.235           | 1123            |
| 3-hydroxybutyric acid   | 147        | 766           | 5.715           | 1152            |
| methanolphosphate       | 241        | 897           | 5.796           | 1158            |
| n-methyl-dl-alanine     | 130        | 853           | 5.943           | 1167            |
| urea                    | 147        | 789           | 6.232           | 1185            |
| valine                  | 144        | 989           | 6.807           | 1216            |
| 4-hydroxybutyric acid   | 76         | 901           | 6.994           | 1225            |
| hydroxycarbamate        | 147        | 751           | 7.249           | 1237            |
| pyrophosphoric acid     | 300        | 912           | 7.844           | 1266            |
| leucine                 | 158        | 936           | 7.966           | 1272            |
| 2-aminoethanol          | 174        | 987           | 8.014           | 1274            |
| isonicotinic acid       | 180        | 966           | 8.041           | 1275            |
| glycerol                | 147        | 972           | 8.102           | 1278            |
| norvaline               | 73         | 879           | 8.163           | 1233            |
| proline                 | 142        | 896           | 8.49            | 1294            |
| succinic acid           | 147        | 937           | 8.572           | 1301            |
| glycine                 | 174        | 990           | 8.796           | 1310            |
| methylsuccinic acid     | 147        | 745           | 8.915           | 1315            |
| uracil                  | 241        | 845           | 9.17            | 1326            |
| glyceric acid           | 147        | 836           | 9.296           | 1331            |
| fumaric acid            | 245        | 910           | 9.459           | 1338            |
| erythronic acid lactone | 147        | 806           | 9.871           | 1371            |
| 2,5-dihydroxypyrazine   | 241        | 766           | 9.966           | 1359            |
| l-serine                | 204        | 988           | 10.071          | 1363            |
| methylserine            | 232        | 880           | 10.755          | 1392            |
| threonine               | 219        | 984           | 10.833          | 1395            |
| β-alanine               | 174        | 966           | 11.748          | 1431            |
| spermidine              | 144        | 871           | 12.057          | 1443            |
| homoserine              | 218        | 874           | 12.364          | 1455            |
| asparagine              | 100        | 938           | 13.085          | 1483            |

|                              |     |     |        |      |
|------------------------------|-----|-----|--------|------|
| malic acid                   | 147 | 900 | 13.302 | 1492 |
| salicylic acid               | 267 | 752 | 13.595 | 1503 |
| l-5-oxoproline               | 156 | 928 | 13.734 | 1508 |
| l-methionine                 | 176 | 966 | 13.911 | 1515 |
| aspartic acid                | 232 | 811 | 14.149 | 1524 |
| GABA                         | 174 | 718 | 14.452 | 1535 |
| 4-hydroxyproline             | 140 | 846 | 14.564 | 1540 |
| cysteine                     | 146 | 844 | 15.02  | 2284 |
| 2-hydroxyglutaric acid       | 247 | 868 | 15.523 | 1576 |
| threonic acid                | 292 | 933 | 15.56  | 1578 |
| dl-2,3-diaminopropionic acid | 174 | 765 | 16.577 | 1616 |
| 4-hydroxybenzoic acid        | 267 | 702 | 16.655 | 1620 |
| glutamic acid                | 246 | 700 | 16.744 | 1621 |
| phenylalanine                | 142 | 812 | 16.757 | 1623 |
| l-asparagine                 | 116 | 951 | 17.961 | 1670 |
| phthalic acid                | 147 | 733 | 18.165 | 1678 |
| glycerol-2-phosphate         | 243 | 838 | 19.692 | 1738 |
| xylonic acid                 | 73  | 747 | 22.185 | 1740 |
| aconitic acid                | 147 | 779 | 19.93  | 1747 |
| pentonic acid                | 73  | 731 | 22.559 | 1754 |
| putrescine                   | 174 | 870 | 20.247 | 1657 |
| ribonic acid                 | 73  | 738 | 22.729 | 1761 |
| glutamine                    | 156 | 955 | 20.485 | 1769 |
| 3-phosphoglycerate           | 299 | 816 | 20.587 | 1773 |
| xylonic acid                 | 292 | 826 | 21.141 | 1795 |
| citrulline                   | 157 | 808 | 21.944 | 1828 |
| citric acid                  | 273 | 960 | 22.097 | 1834 |
| cis-aconitic acid            | 73  | 828 | 22.144 | 1734 |
| glucosamine                  | 73  | 796 | 22.614 | 1928 |
| hexoside                     | 73  | 752 | 25.117 | 1857 |
| asparagine                   | 188 | 709 | 23.069 | 1874 |
| allantoin                    | 331 | 965 | 23.549 | 1894 |
| gulcono-1,4-lactone          | 217 | 726 | 23.889 | 1909 |
| homocarnosine                | 154 | 937 | 23.944 | 1911 |
| glucono-1,5-lactone          | 217 | 848 | 24.114 | 1918 |
| 1-methylgalactose            | 204 | 756 | 26.702 | 1923 |
| 4-hydroxycinnamic acid       | 293 | 807 | 24.321 | 1927 |
| lysine                       | 174 | 907 | 24.627 | 1940 |
| tyrosine                     | 218 | 962 | 24.695 | 1943 |
| galactonic acid              | 205 | 724 | 27.963 | 1976 |
| pantothenic acid             | 117 | 917 | 25.987 | 1999 |
| hexitol                      | 318 | 737 | 29.048 | 2023 |
| palmitic acid                | 117 | 708 | 26.906 | 2040 |
| gluconic acid                | 147 | 927 | 27.021 | 2045 |
| saccharic acid               | 147 | 853 | 27.572 | 1996 |
| n-acetyl-d-glucosamine       | 147 | 788 | 27.974 | 2087 |
| tryptophan                   | 202 | 893 | 30.715 | 2215 |
| serotonin                    | 174 | 826 | 35.751 | 2470 |
| lactulose                    | 204 | 802 | 41.54  | 2648 |
| sucrose                      | 217 | 939 | 40.033 | 2707 |
| trehalose                    | 204 | 767 | 42.924 | 2728 |
| maltose                      | 73  | 705 | 43.539 | 2764 |
| raffinose                    | 217 | 758 | 52.558 | 3354 |
| sitosterol                   | 129 | 779 | 52.932 | 3381 |
| melezitose                   | 133 | 763 | 54.344 | 3484 |

<sup>a</sup> Retention Time (RT, min) on the DB-5 capillary column.

<sup>b</sup> Retention Index (RI) was auto-generated via MS-DIAL based on the Kovat's index calculation method on a DB-5 capillary column.

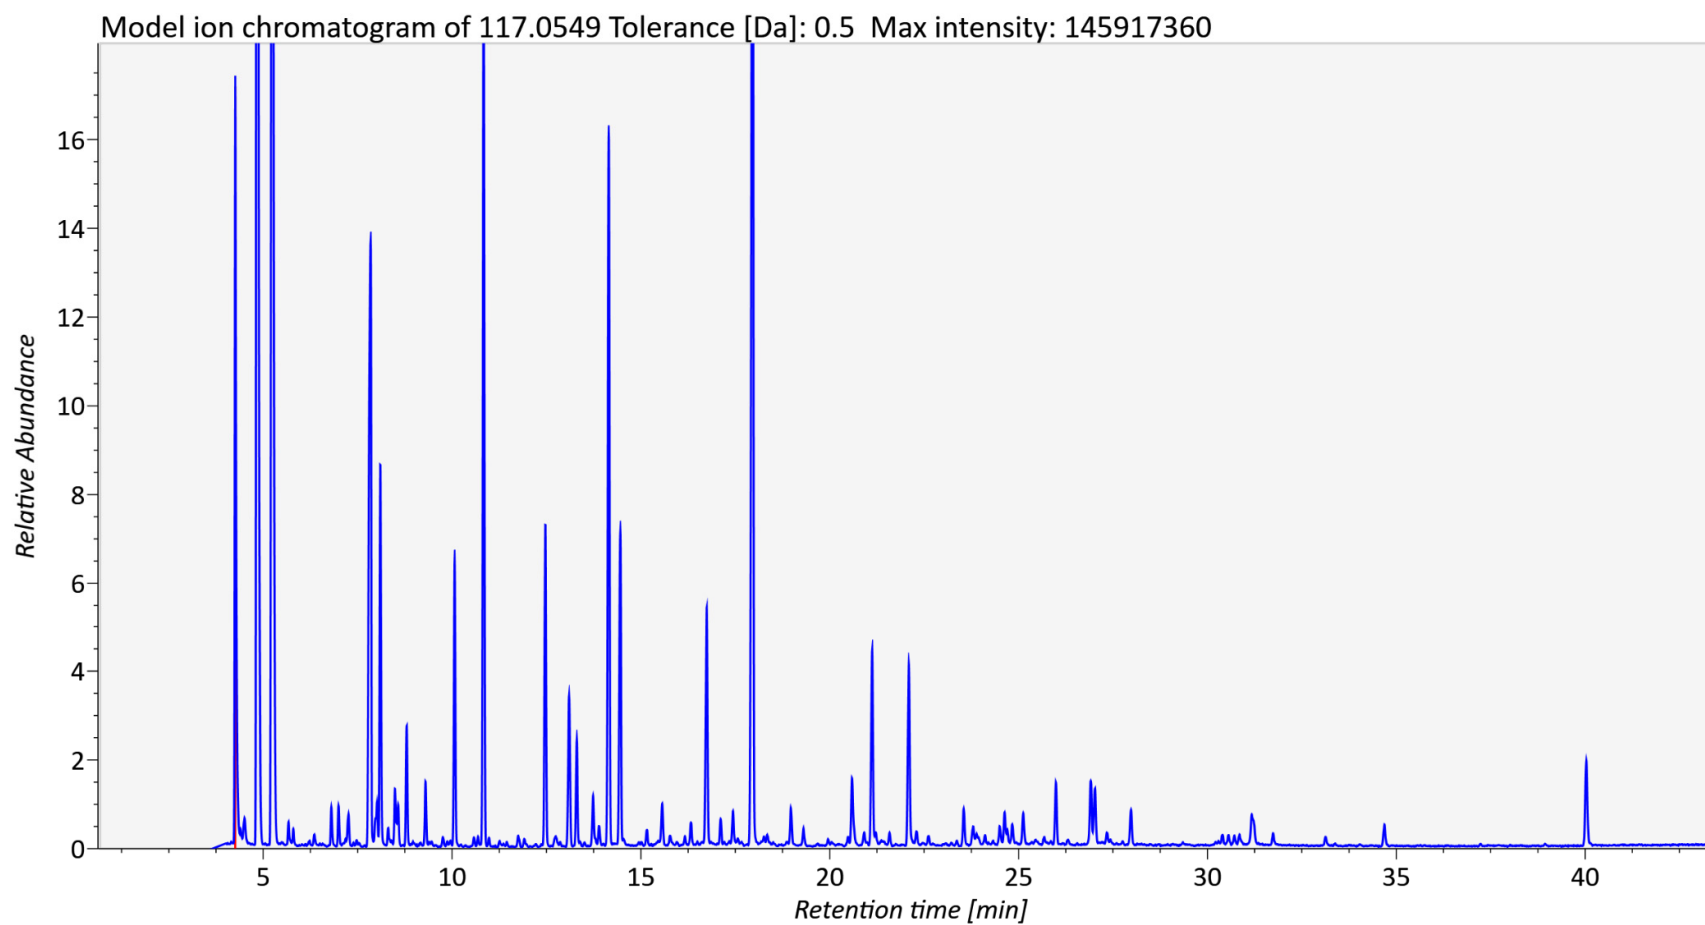

**Figure S1.** Exemplary GC chromatogram of the brown rice ZJZ from the *indica* cultivar.

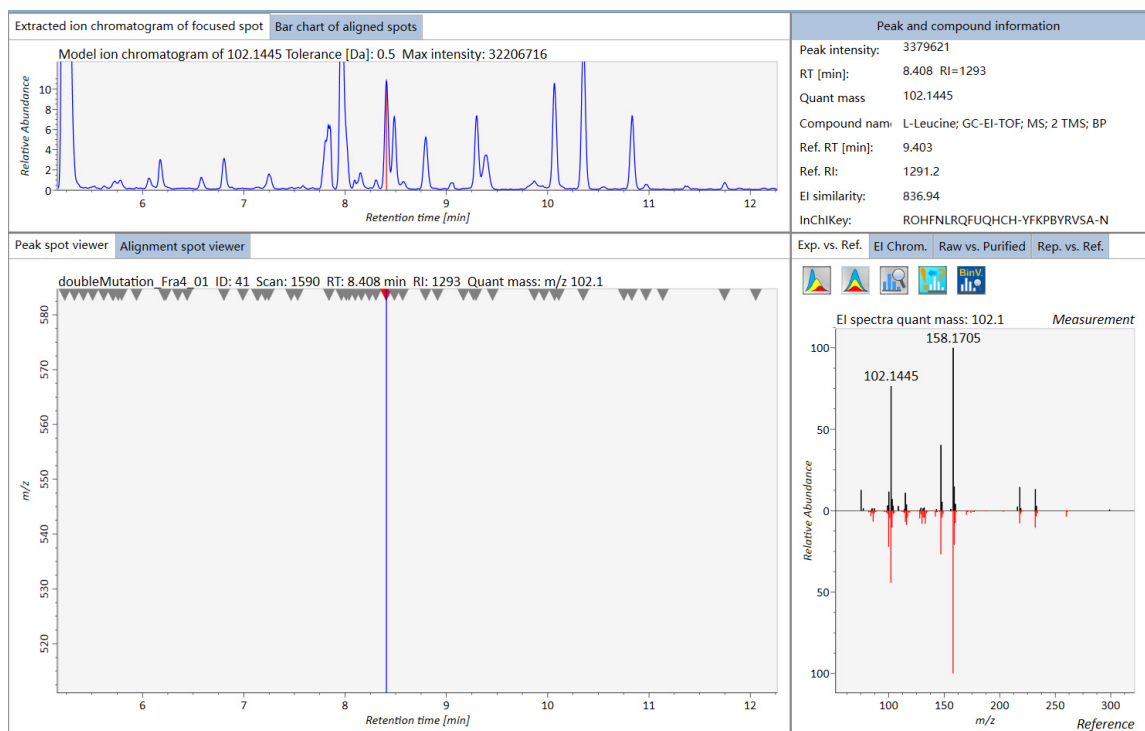

**Figure S2.** Exemplary interface of the identification of leucine via MS-DIAL.

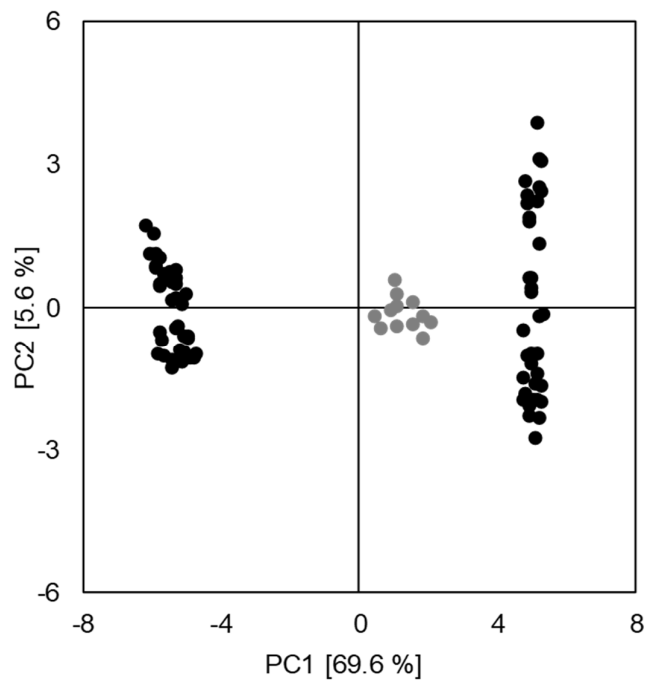

**Figure S3.** PCA score plot of the metabolomics data of the real samples (black) and the QC sample (gray).

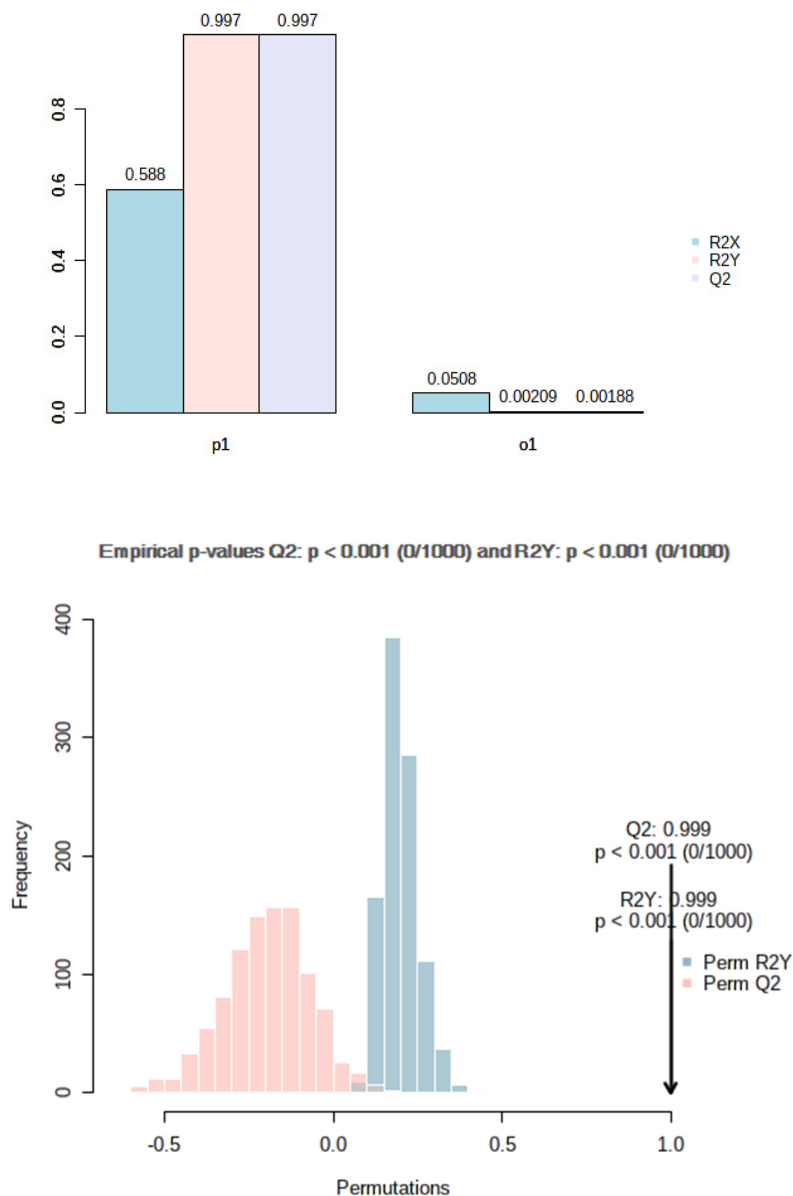

**Figure S4.** The cross-validation parameters and the permutation test result of the OPLS-DA model.

**Table S2.** VOCs identified by HS-SPME-GC-MS in brown rice and germinated brown rice samples.

| VOCs                          | m/z | RI ref <sup>a</sup> | RI cal <sup>b</sup> | MS match index |
|-------------------------------|-----|---------------------|---------------------|----------------|
| Alkanes                       |     |                     |                     |                |
| pentane                       | 43  | 500                 | 512                 | 940            |
| Heptane                       | 71  | 700                 | 706                 | 814            |
| Octane                        | 85  | 800                 | 799                 | 906            |
| Nonane                        | 57  | 900                 | 897                 | 896            |
| 2,2,4,6,6-Pentamethyl-heptane | 57  | 954                 | 953                 | 935            |
| Decane                        | 57  | 1000                | 1006                | 942            |
| Undecane                      | 85  | 1100                | 1089                | 863            |
| Tetradecane                   | 85  | 1400                | 1394                | 873            |
| Alkenes                       |     |                     |                     |                |

|                                     |     |      |      |     |
|-------------------------------------|-----|------|------|-----|
| 1,4-Pentadiene                      | 69  | 646  | 660  | 862 |
| 1-Octene                            | 70  | 842  | 855  | 884 |
| 1,3-Octadiene                       | 54  | 954  | 949  | 901 |
| Myrcene                             | 93  | 1145 | 1149 | 865 |
| Aldehydes                           |     |      |      |     |
| 2-Methyl-propanal                   | 72  | 812  | 828  | 843 |
| Butanal                             | 44  | 867  | 860  | 829 |
| Methacrolein                        | 70  | 893  | 898  | 959 |
| 2-Methyl-butanal                    | 57  | 907  | 912  | 863 |
| 3-Methyl-butanal                    | 44  | 916  | 920  | 832 |
| Pentanal                            | 44  | 975  | 979  | 815 |
| Hexanal                             | 56  | 1079 | 1076 | 832 |
| Heptanal                            | 70  | 1183 | 1180 | 858 |
| 3-Methyl-2-butenal                  | 84  | 1215 | 1219 | 969 |
| (E)-2-hexenal                       | 98  | 1220 | 1225 | 839 |
| Octanal                             | 84  | 1293 | 1288 | 943 |
| Nonanal                             | 98  | 1389 | 1384 | 851 |
| (E)-2-Octenal                       | 70  | 1420 | 1422 | 808 |
| Decanal                             | 82  | 1484 | 1481 | 948 |
| (E,E)-2,4-Heptadienal               | 81  | 1498 | 1495 | 951 |
| Benzaldehyde                        | 105 | 1530 | 1520 | 914 |
| (E)-2-nonenal                       | 70  | 1532 | 1530 | 817 |
| (E,E)-2,4-Nonadienal                | 81  | 1699 | 1705 | 896 |
| (E)-2-Undecenal                     | 121 | 1750 | 1755 | 879 |
| (E,E)-2,4-Decadienal                | 81  | 1798 | 1802 | 913 |
| 3-Methyl-hexanal                    | 70  | nf   | 1130 | 845 |
| 3,3-Dimethyl-hexanal                | 84  | nf   | 1206 | 866 |
| Furans                              |     |      |      |     |
| Furan                               | 68  | 797  | 799  | 929 |
| 2-Methylfuran                       | 82  | 817  | 822  | 922 |
| Tetrahydrofuran                     | 42  | 829  | 835  | 907 |
| 3-Methylfuran                       | 82  | 858  | 849  | 821 |
| 2-Ethylfuran                        | 81  | 960  | 955  | 893 |
| 2-Propylfuran                       | 81  | 1011 | 1015 | 968 |
| 2-Butyl furan                       | 81  | 1123 | 1130 | 807 |
| 2-Pentylfuran                       | 83  | 1231 | 1237 | 773 |
| 2-Acetyl-5-methylfuran              | 109 | 1593 | 1599 | 916 |
| Ketones                             |     |      |      |     |
| 2-Butanone                          | 43  | 893  | 890  | 892 |
| 2,3-Butanedione                     | 43  | 970  | 971  | 920 |
| 2-Methyl-3-pentanone                | 57  | 997  | 1000 | 782 |
| 3-Penten-2-one                      | 84  | 1132 | 1139 | 864 |
| 2-Heptanone                         | 58  | 1180 | 1175 | 824 |
| 6-Methyl-2-heptanone                | 58  | 1237 | 1230 | 827 |
| 2-Hydroxy-3-butanone                | 45  | 1280 | 1284 | 816 |
| 2-Octanone                          | 43  | 1297 | 1290 | 894 |
| 2-Nonanone                          | 58  | 1387 | 1392 | 846 |
| 3-Octen-2-one                       | 55  | 1414 | 1420 | 812 |
| 3,4,5-Trimethyl-2-cyclopenten-1-one | 109 | 1483 | 1490 | 828 |
| 4,4-Dimethyl-2-cyclopenten-1-one    | 67  | 1511 | 1505 | 856 |
| Alcohols                            |     |      |      |     |
| Ethanol                             | 46  | 939  | 935  | 853 |
| 1-Pentanol                          | 56  | 1252 | 1259 | 901 |
| 1-Hexanol                           | 57  | 1360 | 1366 | 954 |
| Cyclohexanol                        | 57  | 1393 | 1399 | 957 |
| 1-Heptanol                          | 57  | 1444 | 1450 | 905 |
| 1-Octen-3-ol                        | 70  | 1453 | 1456 | 937 |
| 2-Ethylhexanol                      | 56  | 1480 | 1470 | 877 |

|                          |     |      |      |     |
|--------------------------|-----|------|------|-----|
| n-Octanol                | 93  | 1558 | 1562 | 894 |
| Benzyl alcohol           | 42  | 1865 | 1870 | 939 |
| 2-Phenylethanol          | 91  | 1912 | 1920 | 861 |
| <hr/>                    |     |      |      |     |
| Esters                   |     |      |      |     |
| Methyl acetate           | 74  | 825  | 827  | 842 |
| ethyl acetate            | 43  | 894  | 900  | 956 |
| Ethyl hexadecanoate      | 101 | 2241 | 2250 | 803 |
| ethyl oleate             | 97  | 2470 | 2460 | 933 |
| Caproic acid vinyl ester | 99  | nf   | 1300 | 881 |
| <hr/>                    |     |      |      |     |
| Others                   |     |      |      |     |
| $\alpha$ -Pinene         | 107 | 1026 | 1030 | 902 |
| 2-Acetyl-1-pyrroline     | 94  | 1317 | 1322 | 937 |
| Acetic acid              | 60  | 1479 | 1485 | 888 |
| Hexanoic acid            | 60  | 1849 | 1840 | 827 |
| Heptanoic acid           | 60  | 1957 | 1950 | 884 |
| Phenol                   | 107 | 2008 | 2009 | 821 |
| Nonanoic acid            | 60  | 2174 | 2170 | 932 |
| 4-Ethylphenol            | 81  | 2183 | 2180 | 895 |
| Decanoic acid            | 73  | 2279 | 2275 | 955 |
| Indole                   | 107 | 2448 | 2450 | 946 |

<sup>a</sup> RI ref, the Kovats' retention index information obtained from the NIST Chemistry WebBook database (<https://webbook.nist.gov/chemistry/name-ser/>).

<sup>b</sup> RI cal, the experimental Kovat's retention index calculated based on a DB-WAX capillary column.

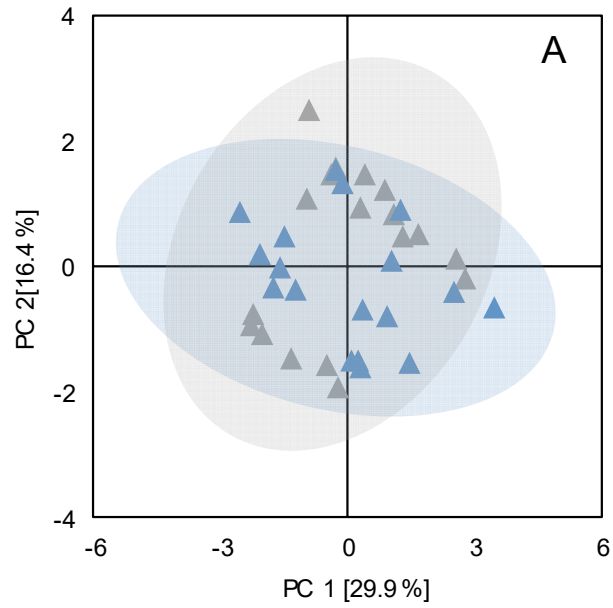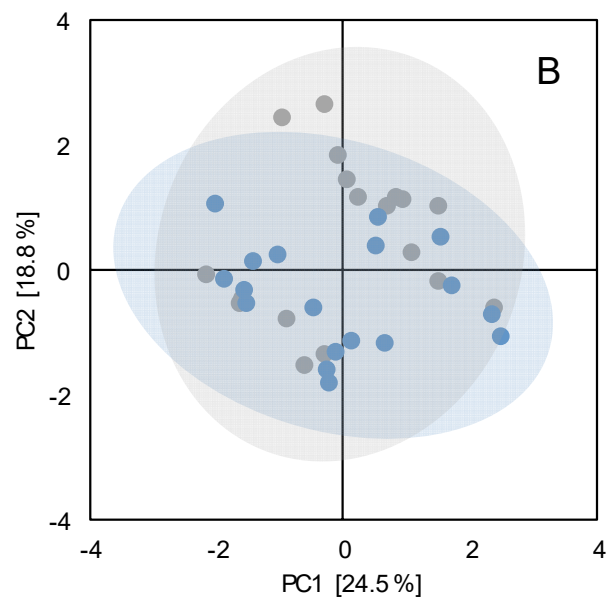

**Figure S5.** PCA score plot of the volatile profiling data of the brown rice (A) and the germinated brown rice (B) from the *indica* cultivars (triangle) and the *japonica* cultivars (circle); the boundaries of the clusters correspond to the 95% Hotelling's T2 ellipses. .
